# Supplementary material for: Assessing the Protective Dose of a Candidate DIVA Vaccine against Classical Swine Fever
Source: MDPI journal article supplement (doi:10.3390/vaccines9050483), 2021-05-10
Supplement: s1 [file s1]

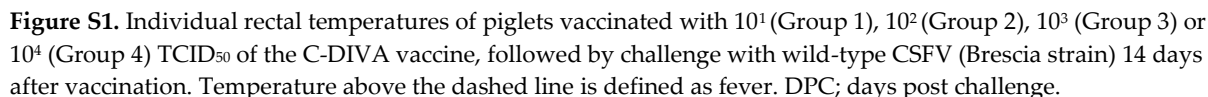

**Table S1.** Individual rectal temperatures of piglets vaccinated with 10<sup>1</sup> (Group 1), 10<sup>2</sup> (Group 2), 10<sup>3</sup> (Group 3) or 10<sup>4</sup> (Group 4) TCID<sub>50</sub> of the C-DIVA vaccine, followed by challenge with wild-type CSFV (Brescia strain) 14 days after vaccination. One group of 4 piglets was mock-vaccinated. Temperatures between 40°C and 40.5°C are highlighted in red; Temperatures >40.5°C are highlighted in green.
